# Supplementary material for: Ultraviolet-visible study on acid-base equilibria of aporphine alkaloids with antiplasmodial and antioxidant activities from Alseodaphne corneri and Dehaasia longipedicellata
Source: PubMed Central journal article supplement (PMC4761911; doi:10.1038/srep21517), 2016-02-22
Supplement: srep21517-s1.pdf [file srep21517-s1.pdf]

**Ultraviolet-visible study on acid-base equilibria of aporphine alkaloids with antiplasmodial and antioxidant activities from *Alseodaphne corneri* and *Dehaasia longipedicellata*.**

Azeana Zahari<sup>1</sup>, Abdulwali Ablat<sup>2</sup>, Noridayu Omer<sup>1</sup>, Mohd Azlan Nafiah<sup>3</sup>, Yasodha Sivasothy<sup>1</sup>, Jamaludin Mohamad<sup>2</sup>, Mohammad Niyaz Khan<sup>1</sup>, Khalijah Awang<sup>1, \*</sup>

<sup>1</sup> Department of Chemistry, Faculty of Science, University of Malaya, 50603 Kuala Lumpur, Malaysia.

<sup>2</sup> Institute of Biological Sciences, Faculty of Science, University of Malaya, 50603 Kuala Lumpur, Malaysia.

<sup>3</sup> Chemistry Department, Faculty of Science and Mathematics, University of Pendidikan Sultan Idris, 35900 Tanjung Malim, Perak, Malaysia.

boldine model

Maximum number of iterations: 25    Weights - absolute

| Formula         | Log Beta | A | H |        |
|-----------------|----------|---|---|--------|
| AH              | 11.0     | 1 | 1 | refine |
| AH <sub>2</sub> | 20.0     | 1 | 2 | refine |

**Supplementary Figure S1.** Proposed chemical model of Boldine 3.

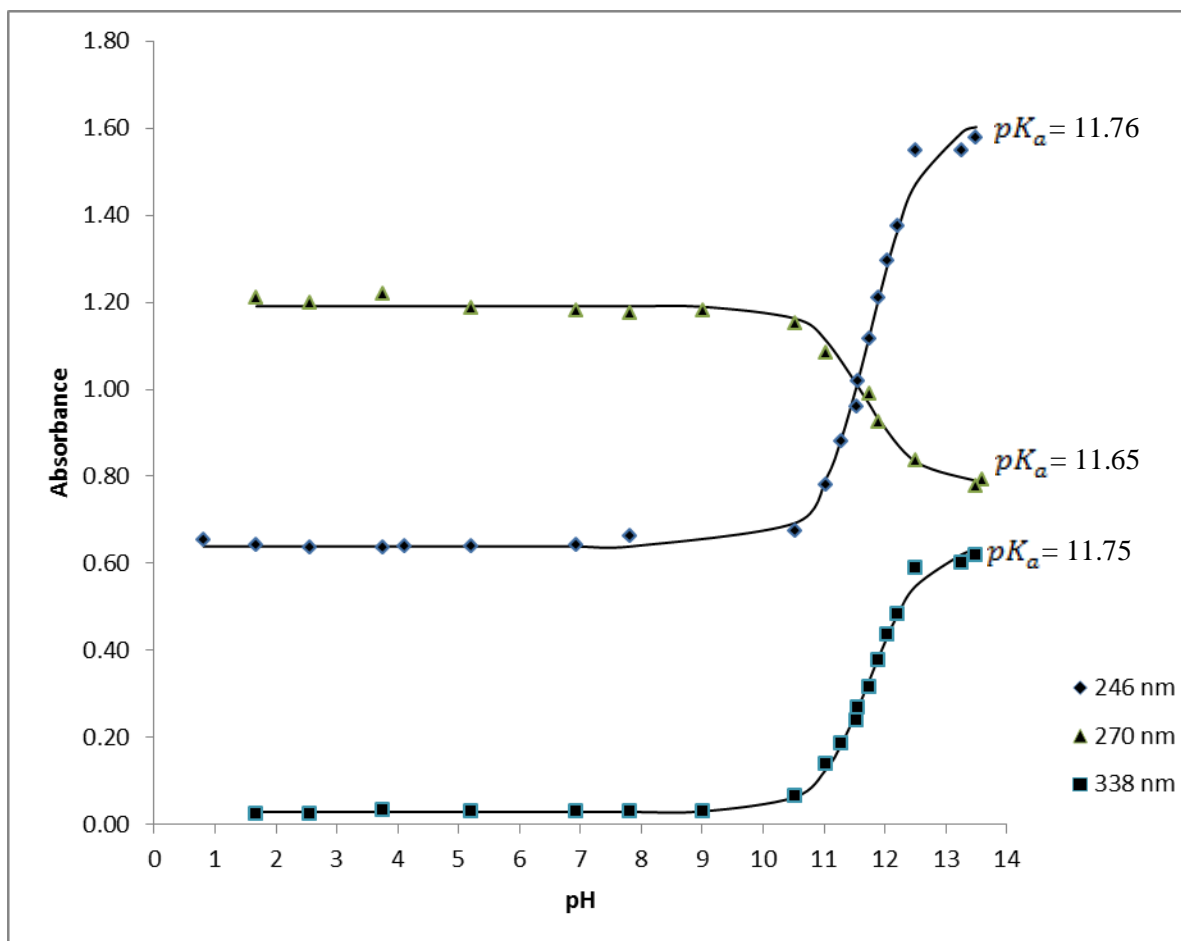

**Supplementary Figure S2.** pH-Absorbance curves of Isocorydine 1 in 2% v/v acetonitrile at 246 nm, 270 nm, and 338 nm.

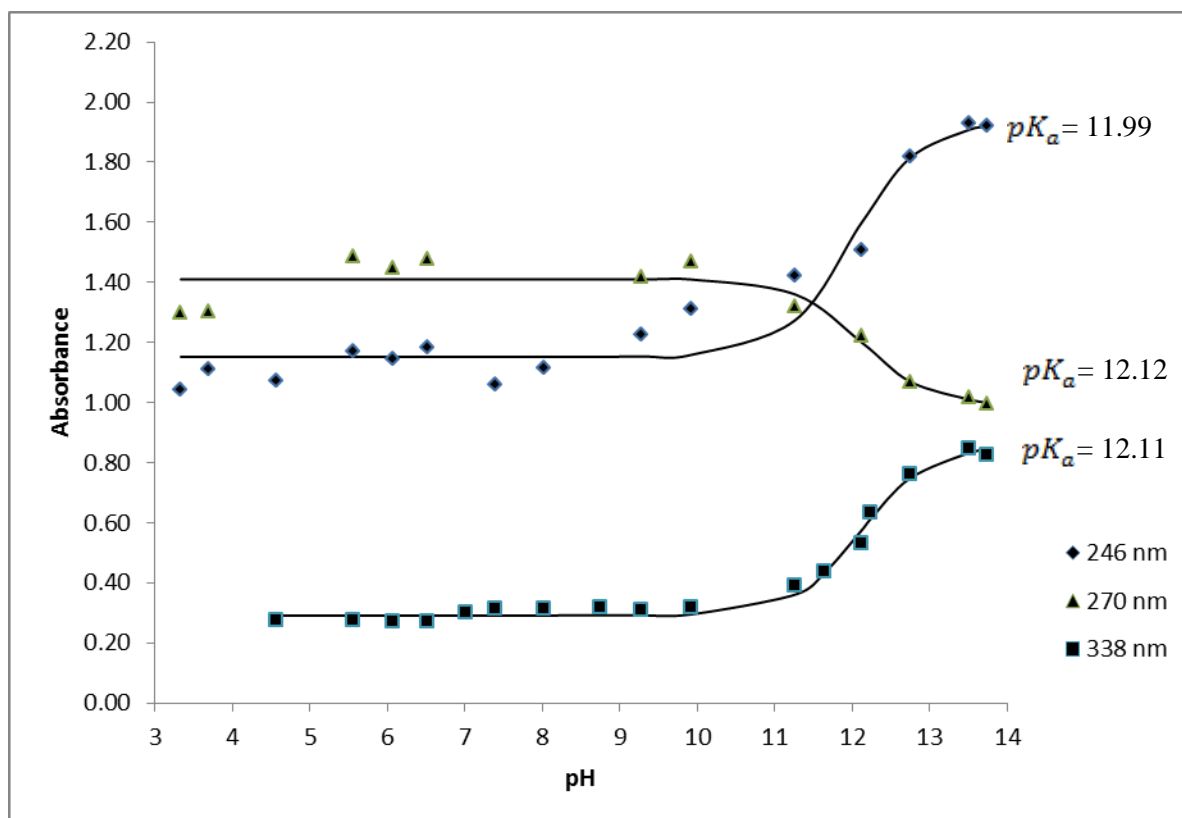

**Supplementary Figure S3.** pH-Absorbance curves of Norisocorydine **2** in 2% v/v acetonitrile at 246 nm, 270 nm, and 338 nm.

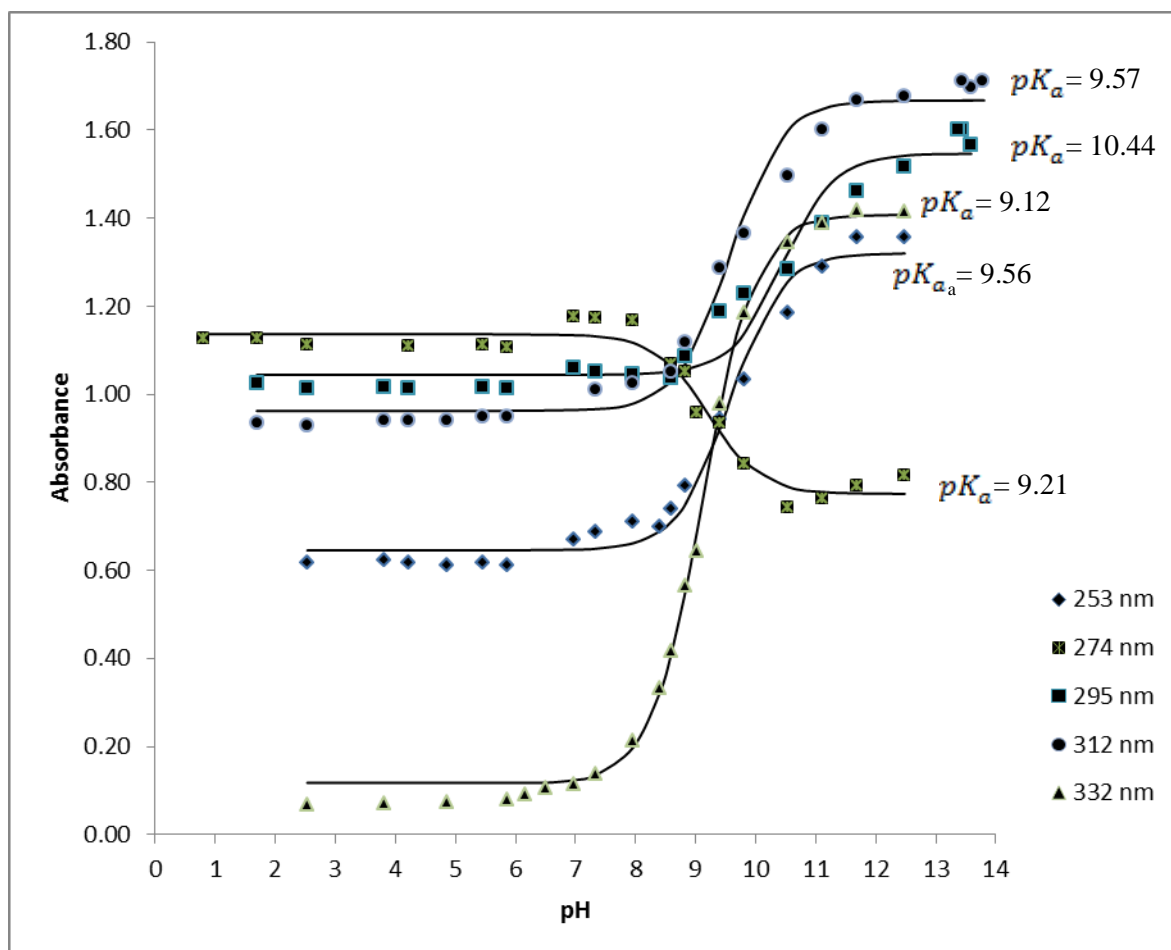

**Supplementary Figure S4.** pH-Absorbance curves of Boldine **3** in 2% v/v acetonitrile at 253 nm, 274 nm, 295 nm, 312 nm and 332 nm.

**Supplementary Table S1** The values of observed absorbance ( $A_{\text{obs}}$ ) at 338 nm as a function of pH for ionization of Isocorydine **1** in 2% v/v acetonitrile

| pH    | $A_{\text{obs}}$ | $A_{\text{calc}}$ | %RE    |
|-------|------------------|-------------------|--------|
| 13.50 | 0.620            | 0.629             | -1.43  |
| 13.27 | 0.602            | 0.622             | -3.25  |
| 12.51 | 0.589            | 0.549             | 6.82   |
| 12.20 | 0.484            | 0.479             | 0.99   |
| 12.04 | 0.438            | 0.432             | 1.35   |
| 11.89 | 0.377            | 0.383             | -1.47  |
| 11.74 | 0.315            | 0.330             | -4.85  |
| 11.56 | 0.270            | 0.268             | 0.68   |
| 11.53 | 0.240            | 0.258             | -7.58  |
| 11.28 | 0.187            | 0.183             | 1.95   |
| 11.04 | 0.140            | 0.129             | 8.10   |
| 10.52 | 0.066            | 0.063             | 4.09   |
| 9.01  | 0.030            | 0.031             | -2.13  |
| 7.82  | 0.031            | 0.030             | 4.49   |
| 6.93  | 0.030            | 0.030             | 1.51   |
| 5.21  | 0.030            | 0.030             | 1.54   |
| 3.75  | 0.034            | 0.030             | 13.13  |
| 2.55  | 0.025            | 0.030             | -18.15 |
| 1.68  | 0.025            | 0.030             | -18.15 |

$$K_a = (1.769 \pm 0.098) \times 10^{-12}$$

$$10^{-2} E_{\text{SH}} = 2.95 \pm 0.47$$

$$10^{-2} E_{\text{S}^-} = 63.95 \pm 0.91$$

**Supplementary Table S2** The values of observed absorbance ( $A_{\text{obs}}$ ) at 270 nm as a function of pH for ionization of Isocorydine **1** in 2% v/v acetonitrile

| pH    | $A_{\text{obs}}$ | $A_{\text{calc}}$ | %RE   |
|-------|------------------|-------------------|-------|
| 13.6  | 0.794            | 0.789             | 0.68  |
| 13.5  | 0.777            | 0.790             | -1.64 |
| 12.51 | 0.838            | 0.833             | 0.54  |
| 11.89 | 0.926            | 0.933             | -0.73 |
| 11.74 | 0.991            | 0.967             | 2.47  |
| 11.04 | 1.084            | 1.111             | -2.46 |
| 10.52 | 1.153            | 1.163             | -0.84 |
| 9.01  | 1.181            | 1.190             | -0.74 |
| 7.82  | 1.175            | 1.191             | -1.33 |
| 6.93  | 1.181            | 1.191             | -0.82 |
| 5.21  | 1.187            | 1.191             | -0.31 |
| 3.75  | 1.220            | 1.191             | 2.41  |
| 2.55  | 1.200            | 1.191             | 0.78  |
| 1.68  | 1.211            | 1.191             | 1.68  |

$$K_a = (2.24 \pm 0.3) \times 10^{-12}$$

$$10^{-2} E_{\text{SH}} = 119.07 \pm 0.63$$

$$10^{-2} E_{\text{s-}} = 78.4 \pm 1.1$$

**Supplementary Table S3** The values of observed absorbance ( $A_{\text{obs}}$ ) at 246 nm as a function of pH for ionization of Isocorydine **1** in 2% v/v acetonitrile

| pH    | $A_{\text{obs}}$ | $A_{\text{calc}}$ | %RE    |
|-------|------------------|-------------------|--------|
| 13.50 | 1.578            | 1.602             | -1.55  |
| 13.27 | 1.548            | 1.591             | -2.76  |
| 12.51 | 1.550            | 1.473             | 4.99   |
| 12.20 | 1.376            | 1.360             | 1.17   |
| 12.04 | 1.295            | 1.284             | 0.86   |
| 11.89 | 1.211            | 1.204             | 0.58   |
| 11.74 | 1.117            | 1.120             | -0.26  |
| 11.56 | 1.019            | 1.020             | -0.11  |
| 11.53 | 0.959            | 1.004             | -4.71  |
| 11.28 | 0.880            | 0.884             | -0.49  |
| 11.04 | 0.780            | 0.797             | -2.17  |
| 10.52 | 0.675            | 0.693             | -2.63  |
| 7.82  | 0.663            | 0.639             | 3.60   |
| 6.93  | 0.643            | 0.639             | 0.62   |
| 5.21  | 0.639            | 0.639             | -0.002 |
| 4.12  | 0.639            | 0.639             | -0.002 |
| 3.75  | 0.638            | 0.639             | -0.16  |
| 2.55  | 0.636            | 0.639             | -0.47  |
| 1.68  | 0.644            | 0.639             | 0.77   |
| 0.81  | 0.654            | 0.639             | 2.29   |

$$K_a = (1.750 \pm 0.019) \times 10^{-12}$$

$$10^{-2} E_{\text{SH}} = 63.90 \pm 0.89$$

$$10^{-2} E_{\text{S}^-} = 161.99 \pm 1.81$$

**Supplementary Table S4** The values of observed absorbance ( $A_{\text{obs}}$ ) at 338 nm as a function of pH for ionization of Norisocorydine **2** in 2% v/v acetonitrile

| pH    | $A_{\text{obs}}$ | $A_{\text{calc}}$ | %RE    |
|-------|------------------|-------------------|--------|
| 13.73 | 0.824            | 0.8415            | -2.13  |
| 13.51 | 0.847            | 0.8331            | 1.63   |
| 12.74 | 0.760            | 0.7473            | 1.67   |
| 12.24 | 0.634            | 0.6141            | 3.14   |
| 12.12 | 0.529            | 0.5754            | -8.77  |
| 11.64 | 0.439            | 0.4332            | 1.32   |
| 11.26 | 0.392            | 0.3606            | 8.01   |
| 9.91  | 0.316            | 0.2947            | 6.74   |
| 9.27  | 0.310            | 0.2920            | 5.81   |
| 8.75  | 0.320            | 0.2914            | 8.93   |
| 8.02  | 0.312            | 0.2912            | 6.66   |
| 7.39  | 0.314            | 0.2912            | 7.27   |
| 7.01  | 0.300            | 0.2912            | 2.94   |
| 6.52  | 0.270            | 0.2912            | -7.84  |
| 6.07  | 0.269            | 0.2912            | -8.24  |
| 5.55  | 0.275            | 0.2912            | -5.88  |
| 4.57  | 0.277            | 0.2912            | -5.11  |
| 3.68  | 0.256            | 0.2912            | -13.74 |
| 3.33  | 0.260            | 0.2912            | -11.99 |

$$K_a = (7.72 \pm 1.08) \times 10^{-13}$$

$$10^{-2} E_{\text{SH}} = 29.11 \pm 0.72$$

$$10^{-2} E_{\text{S}^-} = 85.5 \pm 1.88$$



**Supplementary Table S5** The values of observed absorbance ( $A_{\text{obs}}$ ) at 270 nm as a function of pH for ionization of Norisocorydine **2** in 2% v/v acetonitrile

| pH    | $A_{\text{obs}}$ | $A_{\text{calc}}$ | %RE   |
|-------|------------------|-------------------|-------|
| 13.73 | 0.998            | 1.000             | -0.20 |
| 13.51 | 1.017            | 1.010             | 0.69  |
| 12.74 | 1.069            | 1.070             | -0.09 |
| 12.12 | 1.221            | 1.200             | 1.72  |
| 11.26 | 1.318            | 1.360             | -3.19 |
| 9.91  | 1.469            | 1.410             | 4.02  |
| 9.27  | 1.418            | 1.410             | 0.56  |
| 6.52  | 1.477            | 1.410             | 4.54  |
| 6.07  | 1.448            | 1.410             | 2.62  |
| 5.55  | 1.485            | 1.410             | 5.05  |
| 3.68  | 1.301            | 1.410             | -8.38 |
| 3.33  | 1.297            | 1.410             | -8.71 |

$$K_a = (7.63 \pm 5.22) \times 10^{-13}$$

$$10^{-2} E_{\text{SH}} = 141 \pm 2.52$$

$$10^{-2} E_{\text{s}^-} = 99.46 \pm 5.18$$

**Supplementary Table S6** The values of observed absorbance ( $A_{\text{obs}}$ ) at 246 nm as a function of pH for ionization of Norisocorydine **2** in 2% v/v acetonitrile

| pH    | $A_{\text{obs}}$ | $A_{\text{calc}}$ | %RE    |
|-------|------------------|-------------------|--------|
| 13.73 | 1.922            | 1.917             | 0.24   |
| 13.51 | 1.928            | 1.909             | 1.01   |
| 12.74 | 1.819            | 1.814             | 0.29   |
| 12.12 | 1.508            | 1.600             | -6.08  |
| 11.26 | 1.423            | 1.274             | 10.45  |
| 9.91  | 1.313            | 1.158             | 11.78  |
| 9.27  | 1.228            | 1.153             | 6.08   |
| 8.02  | 1.117            | 1.152             | -3.13  |
| 7.39  | 1.061            | 1.152             | -8.56  |
| 6.52  | 1.182            | 1.152             | 2.55   |
| 6.07  | 1.144            | 1.152             | -0.69  |
| 5.55  | 1.170            | 1.152             | 1.55   |
| 4.57  | 1.072            | 1.152             | -7.45  |
| 3.68  | 1.109            | 1.152             | -3.86  |
| 3.33  | 1.044            | 1.152             | -10.33 |

$$K_a = (1.02 \pm 0.47) \times 10^{-12}$$

$$10^{-2} E_{\text{SH}} = 115.18 \pm 2.72$$

$$10^{-2} E_{\text{S}^-} = 193.13 \pm 6.26$$

**Supplementary Table S7** The values of observed absorbance ( $A_{\text{obs}}$ ) at 332 nm as a function of pH for ionization of Boldine **3** in 2% v/v acetonitrile

| pH    | $A_{\text{obs}}$ | $A_{\text{calc}}$ | %RE    |
|-------|------------------|-------------------|--------|
| 12.48 | 1.414            | 1.408             | 0.45   |
| 11.68 | 1.417            | 1.405             | 0.87   |
| 11.11 | 1.390            | 1.395             | -0.37  |
| 10.53 | 1.345            | 1.360             | -1.11  |
| 9.80  | 1.184            | 1.185             | -0.10  |
| 9.40  | 0.978            | 0.964             | 1.45   |
| 9.01  | 0.645            | 0.681             | -5.56  |
| 8.83  | 0.564            | 0.554             | 1.78   |
| 8.58  | 0.417            | 0.405             | 2.92   |
| 8.40  | 0.331            | 0.322             | 2.68   |
| 7.96  | 0.213            | 0.198             | 6.81   |
| 7.34  | 0.137            | 0.136             | 0.92   |
| 6.97  | 0.114            | 0.124             | -8.49  |
| 6.50  | 0.105            | 0.118             | -12.06 |

$$K_a = (7.61 \pm 0.27) \times 10^{-10}$$

$$10^{-2} E_{\text{SH}} = 11.5 \pm 0.8$$

$$10^{-2} E_{\text{s-}} = 141 \pm 0.8$$

**Supplementary Table S8** The values of observed absorbance ( $A_{\text{obs}}$ ) at 312 nm as a function of pH for ionization of Boldine **3** in 2% v/v acetonitrile

| pH    | $A_{\text{obs}}$ | $A_{\text{calc}}$ | %RE   |
|-------|------------------|-------------------|-------|
| 13.59 | 1.696            | 1.667             | 1.69  |
| 13.44 | 1.712            | 1.667             | 2.61  |
| 13.77 | 1.713            | 1.667             | 2.67  |
| 12.48 | 1.676            | 1.666             | 0.57  |
| 11.68 | 1.668            | 1.662             | 0.37  |
| 11.11 | 1.601            | 1.648             | -2.91 |
| 10.53 | 1.495            | 1.597             | -6.86 |
| 9.80  | 1.366            | 1.406             | -2.89 |
| 9.40  | 1.288            | 1.246             | 3.25  |
| 8.83  | 1.118            | 1.070             | 4.25  |
| 8.58  | 1.051            | 1.027             | 2.24  |
| 7.96  | 1.025            | 0.979             | 4.49  |
| 7.34  | 1.011            | 0.966             | 4.43  |
| 5.85  | 0.950            | 0.962             | -1.29 |
| 5.45  | 0.949            | 0.962             | -1.39 |
| 4.85  | 0.940            | 0.962             | -2.35 |
| 4.21  | 0.940            | 0.962             | -2.35 |
| 3.80  | 0.942            | 0.962             | -2.14 |
| 2.53  | 0.930            | 0.962             | -3.45 |
| 1.69  | 0.934            | 0.962             | -3.01 |

$$K_a = (2.68 \pm 0.5) \times 10^{-10}$$

$$10^{-2} E_{\text{SH}} = 96.2 \pm 1.4$$

$$10^{-2} E_{\text{s}^-} = 166.7 \pm 1.7$$

**Supplementary Table S9** The values of observed absorbance ( $A_{\text{obs}}$ ) at 295 nm as a function of pH for ionization of Boldine **3** in 2% v/v acetonitrile

| pH    | $A_{\text{obs}}$ | $A_{\text{calc}}$ | %RE   |
|-------|------------------|-------------------|-------|
| 13.59 | 1.566            | 1.546             | 1.27  |
| 13.44 | 1.600            | 1.546             | 3.38  |
| 13.37 | 1.602            | 1.546             | 3.50  |
| 12.48 | 1.516            | 1.542             | -1.71 |
| 11.68 | 1.462            | 1.519             | -3.89 |
| 11.11 | 1.388            | 1.457             | -4.98 |
| 10.53 | 1.284            | 1.320             | -2.78 |
| 9.80  | 1.228            | 1.137             | 7.43  |
| 9.40  | 1.188            | 1.086             | 8.62  |
| 8.83  | 1.086            | 1.056             | 2.76  |
| 8.58  | 1.037            | 1.051             | -1.34 |
| 7.96  | 1.044            | 1.046             | -0.17 |
| 7.34  | 1.051            | 1.045             | 0.62  |
| 6.97  | 1.059            | 1.044             | 1.39  |
| 5.85  | 1.012            | 1.044             | -3.17 |
| 5.45  | 1.016            | 1.044             | -2.77 |
| 4.21  | 1.012            | 1.044             | -3.17 |
| 3.80  | 1.016            | 1.044             | -2.77 |
| 2.53  | 1.013            | 1.044             | -3.07 |
| 1.69  | 1.024            | 1.044             | -1.96 |

$$K_a = (3.59 \pm 1.2) \times 10^{-11}$$

$$10^{-2} E_{\text{SH}} = 104.4 \pm 1.5$$

$$10^{-2} E_{\text{S}^-} = 154.6 \pm 2.2$$

**Supplementary Table S10** The values of observed absorbance ( $A_{\text{obs}}$ ) at 274 nm as a function of pH for ionization of Boldine **3** in 2% v/v acetonitrile

| pH    | $A_{\text{obs}}$ | $A_{\text{calc}}$ | %RE   |
|-------|------------------|-------------------|-------|
| 12.48 | 0.815            | 0.774             | 5.04  |
| 11.68 | 0.793            | 0.775             | 2.28  |
| 11.11 | 0.763            | 0.778             | -2.00 |
| 10.53 | 0.743            | 0.790             | -6.36 |
| 9.80  | 0.841            | 0.848             | -0.79 |
| 9.40  | 0.934            | 0.916             | 1.97  |
| 9.01  | 0.958            | 0.996             | -3.93 |
| 8.83  | 1.050            | 1.029             | 1.97  |
| 8.58  | 1.068            | 1.067             | 0.07  |
| 7.96  | 1.168            | 1.117             | 4.37  |
| 7.34  | 1.174            | 1.131             | 3.62  |
| 6.97  | 1.175            | 1.134             | 3.47  |
| 5.85  | 1.107            | 1.136             | -2.63 |
| 5.45  | 1.111            | 1.136             | -2.27 |
| 4.21  | 1.108            | 1.136             | -2.55 |
| 2.53  | 1.113            | 1.136             | -2.09 |
| 1.69  | 1.126            | 1.136             | -0.92 |
| 0.80  | 1.126            | 1.136             | -0.92 |

$$K_a = (6.19 \pm 1.5) \times 10^{-10}$$

$$10^{-2} E_{\text{SH}} = 113.6 \pm 1.1$$

$$10^{-2} E_{\text{S}^-} = 77.4 \pm 1.6$$

**Supplementary Table S11** The values of observed absorbance ( $A_{\text{obs}}$ ) at 253 nm as a function of pH for ionization of Boldine **3** in 2% v/v acetonitrile

| pH    | $A_{\text{obs}}$ | $A_{\text{calc}}$ | %RE    |
|-------|------------------|-------------------|--------|
| 12.48 | 1.358            | 1.320             | 2.811  |
| 11.68 | 1.356            | 1.316             | 2.983  |
| 11.11 | 1.291            | 1.302             | -0.858 |
| 10.53 | 1.186            | 1.255             | -5.826 |
| 9.80  | 1.033            | 1.073             | -3.918 |
| 9.40  | 0.944            | 0.921             | 2.441  |
| 8.83  | 0.791            | 0.751             | 5.047  |
| 8.58  | 0.739            | 0.709             | 4.034  |
| 8.40  | 0.698            | 0.689             | 1.299  |
| 7.96  | 0.712            | 0.662             | 7.041  |
| 7.34  | 0.686            | 0.649             | 5.334  |
| 6.97  | 0.670            | 0.647             | 3.418  |
| 5.85  | 0.612            | 0.646             | -5.475 |
| 5.45  | 0.618            | 0.645             | -4.438 |
| 4.85  | 0.613            | 0.645             | -5.284 |
| 4.21  | 0.619            | 0.645             | -4.261 |
| 3.80  | 0.622            | 0.645             | -3.758 |
| 2.53  | 0.619            | 0.645             | -4.261 |

$$K_a = (2.74 \pm 0.5) \times 10^{-10}$$

$$10^{-2} E_{\text{SH}} = 64.5 \pm 1.2$$

$$10^{-2} E_{\text{S}^-} = 132 \pm 2.1$$

### Supplementary Data 1 Nonlinear least squares computer program in BASICA

```
30 PRINT "NO. OF PARAMETERS = ";
40 INPUT N
50 PRINT "NO. OF POINTS";
60 INPUT K
70 DIM J(K,N),L(N,K),E(K,1),C(K,1),O(K,2),B(K,1),V(1,K),W(N,1)
80 DIM M(N,N),X(N,1),T(N,1),U(1,1),F(N,N),S(N,1)
90 PRINT "NN =";
100 INPUT NN
105 PRINT "value of cmc =";
106 INPUT C1
190 FOR I=1 TO K
210 READ Z1
215 O(I,1)=10^(-Z1)
220 NEXT I
230 FOR I= 1 TO K
250 READ Z2
255 O(I,2) = Z2
260 NEXT I
270 PRINT "INITIAL GUESS VALUE OF A1 =";
280 INPUT A1
290 PRINT "INITIAL GUESS VALUE OF A2 =";
294 INPUT A2
295 IF N=2 THEN 310
296 PRINT "INITIAL GUESS VALUE OF A3 =";
297 INPUT A3
298 IF N=3 THEN 310
299 PRINT "INITIAL GUESS VALUE OF A4 =";
```



```

300 INPUT A4
302 IF N=4 THEN 310
304 PRINT "INITIAL GUESS VALUE OF A5 =";
306 INPUT A5
310 PRINT "INITIAL CONC. OF SUBS. =";
320 INPUT X0
322 PRINT "value of kw =";
323 INPUT KW
330 T(1,1)=A1
340 T(2,1)=A2
342 IF N=2 THEN 360
346 T(3,1)=A3
350 IF N=3 THEN 360
352 T(4,1)=A4
354 IF N=4 THEN 360
356 T(5,1)=A5
360 PRINT "TOTAL # OF ITERATION =:
370 INPUT K2
380 DATA 6.08,6.33,6.8,7.43,7.73,8.1,8.17,8.26,8.43,8.57,8.83,9,9.15,9.38,9.56,9
.78,9.9,10.11
381 DATA .845,.855,.832,.905,1.05,1.179,1.334,1.294,1.465,1.587,1.721,1.824,1.92
3,2.07,2.131,2.192,2.25,2.21
382 DATA .000145,.000156,.00015
400 PRINT"ERROR CHECK =";
410 INPUT E0
420 PRINT"TOTAL # OF ITERATION ="K2
421 PRINT"ERROR CHECK ="E0
430 GOSUB 722

```

```

440 A1=T(1,1)
450 A2=T(2,1)
452 IF N=2 THEN 470
454 A3=T(3,1)
456 IF N=3 THEN 470
458 A4=T(4,1)
460 IF N=4 THEN 470
464 A5=T(5,1)
470 FOR I=1 TO K
471 V(1,I)=E(I,1)
472 NEXT I
480 U(1,1)=0!
481 FOR I=1 TO K
482 U(1,1)=U(1,1)+V(1,I)*E(I,1)
483 NEXT I
490 FOR I=1 TO N
500 S(I,1)=SQR(U(1,1)*F(I,I)/(K-N))
510 NEXT I
520 PRINT"ITERATION # ="K1
530 PRINT"A1  ="T(1,1);"STD. ="S(1,1)
540 PRINT"A2  ="T(2,1);"STD. ="S(2,1)
550 IF N=2 THEN 590
560 PRINT"A3  ="T(3,1);"STD. ="S(3,1)
570 IF N=3 THEN 590
580 PRINT"A4  ="T(4,1);"STD. ="S(4,1)
585 IF N=4 THEN 590
587 PRINT"A5  ="T(5,1);"STD. ="S(5,1)
590 PRINT"LEAST SQ. VALUE ="U(1,1)

```

```

600 PRINT"-----"
610 FOR I=1 TO N
620 IF ABS(W(I,1)/T(I,1))<E0 THEN 640
630 IF ABS(W(I,1)/T(I,1))>E0 THEN 660
640 NEXT I
641 PRINT"DO YOU WANT LSQ";
642 INPUT Y9
650 GOTO 680
660 K1=K1+1
670 IF K1<K2 THEN 430
680 PRINT"TIME      Aobs      Acalcd      % Res. Error"
690 FOR I=1 TO K
700 PRINT O(I,1),O(I,2),C(I,1),100*(O(I,2)-C(I,1))/O(I,2)
710 NEXT I
720 STOP
722 IF NN>2 THEN 792
730 FOR I=1 TO K
740 J(I,1)=(X0/(O(I,1)+A1))*(A3-((A2*O(I,1)+A3*A1)/(O(I,1)+A1)))
750 J(I,2)=X0*O(I,1)/(O(I,1)+A1)
760 IF N=2 THEN 785
765 J(I,3)=X0*A1/(A1+O(I,1))
770 IF N=3 THEN 785
774 J(I,4)=
776 IF N=4 THEN 785
778 J(I,5)=
785 C(I,1)=((A1*A3+A2*O(I,1))/(A1+O(I,1)))*X0
789 E(I,1)=O(I,2)-C(I,1)
790 NEXT I

```

```
791 GOTO 800
792 FOR I=1 TO K
793 J(I,1)=1/(A2+O(I,1))
794 J(I,2)=-A1/((A2+O(I,1))^2)
796 C(I,1)=A1/(A2+O(I,1))
797 E(I,1)=O(I,2)-C(I,1)
798 NEXT I
800 FOR I=1 TO K
801 FOR M=1 TO N
802 L(M,I)=J(I,M)
803 NEXT M
804 NEXT I
806 FOR I=1 TO N
807 FOR J=1 TO N
808 F(I,J)=0!
809 X(I,1)=0!
810 W(I,1)=0!
811 NEXT J
812 NEXT I
813 FOR M=1 TO N
814 FOR JJ=1 TO N
815 FOR I=1 TO K
816 F(M,JJ)=L(M,I)*J(I,JJ) + F(M,JJ)
817 NEXT I
818 NEXT JJ
819 NEXT M
820 FOR KK=1 TO N
825 FOR J= 1 TO N-1
```

```
830 M(KK,J)=F(KK,J+1)/F(KK,1)
840 NEXT J
845 M(KK,N)=1/F(KK,1)
850 IF KK=1 THEN 890
855 I=1
860 R1=F(I,1)
865 FOR J=1 TO N-1
870 M(I,J)=F(I,J+1)-R1*M(KK,J)
875 NEXT J
880 M(I,N)=-R1*M(KK,N)
885 IF KK=2 THEN 915
890 I=2
895 R2=F(I,1)
896 FOR J=1 TO N-1
897 M(I,J)=F(I,J+1)-R2*M(KK,J)
900 NEXT J
905 M(I,N)=-R2*M(KK,N)
910 IF KK=3 THEN 955
915 IF N=2 THEN 1004
920 I=3
925 R3=F(I,1)
930 FOR J=1 TO N-1
935 M(I,J)=F(I,J+1)-R3*M(KK,J)
940 NEXT J
945 M(I,N)=-R3*M(KK,N)
950 IF KK=4 THEN 990
955 IF N=3 THEN 1004
960 I=4
```

```
965 R4=F(I,1)
970 FOR J=1 TO N-1
975 M(I,J)=F(I,J+1)-R4*M(KK,J)
980 NEXT J
983 M(I,N)=-R4*M(KK,N)
986 IF KK=5 THEN 1004
990 IF N=4 THEN 1004
992 I=5
994 R5=F(I,1)
996 FOR J=1 TO N-1
998 M(I,J) =F(I,J+1)-R5*M(KK,J)
1000 NEXT J
1002 M(I,N)=-R5*M(KK,N)
1004 FOR I=1 TO N
1006 FOR J=1 TO N
1008 F(I,J)=M(I,J)
1010 NEXT J
1012 NEXT I
1014 NEXT KK
1020 FOR M=1 TO N
1030 FOR I=1 TO K
1040 X(M,1)=X(M,1)+L(M,I)*E(I,1)
1050 NEXT I
1060 NEXT M
1070 FOR MM=1 TO N
1080 FOR I=1 TO N
1090 W(MM,1)=W(MM,1)+F(MM,I)*X(I,1)
1100 NEXT I
```

1110 NEXT MM

1120 FOR I=1 TO N

1130  $T(I,1)=T(I,1)+W(I,1)$

1140 NEXT I

1150 RETURN

1160 END
